# Supplementary material for: The association between food insecurity and incident type 2 diabetes in Canada: A population-based cohort study
Source: PubMed Central journal article supplement (PMC5965821; doi:10.1371/journal.pone.0195962), 2018-05-23

Supplementary Figure 1. Study Flow Diagram

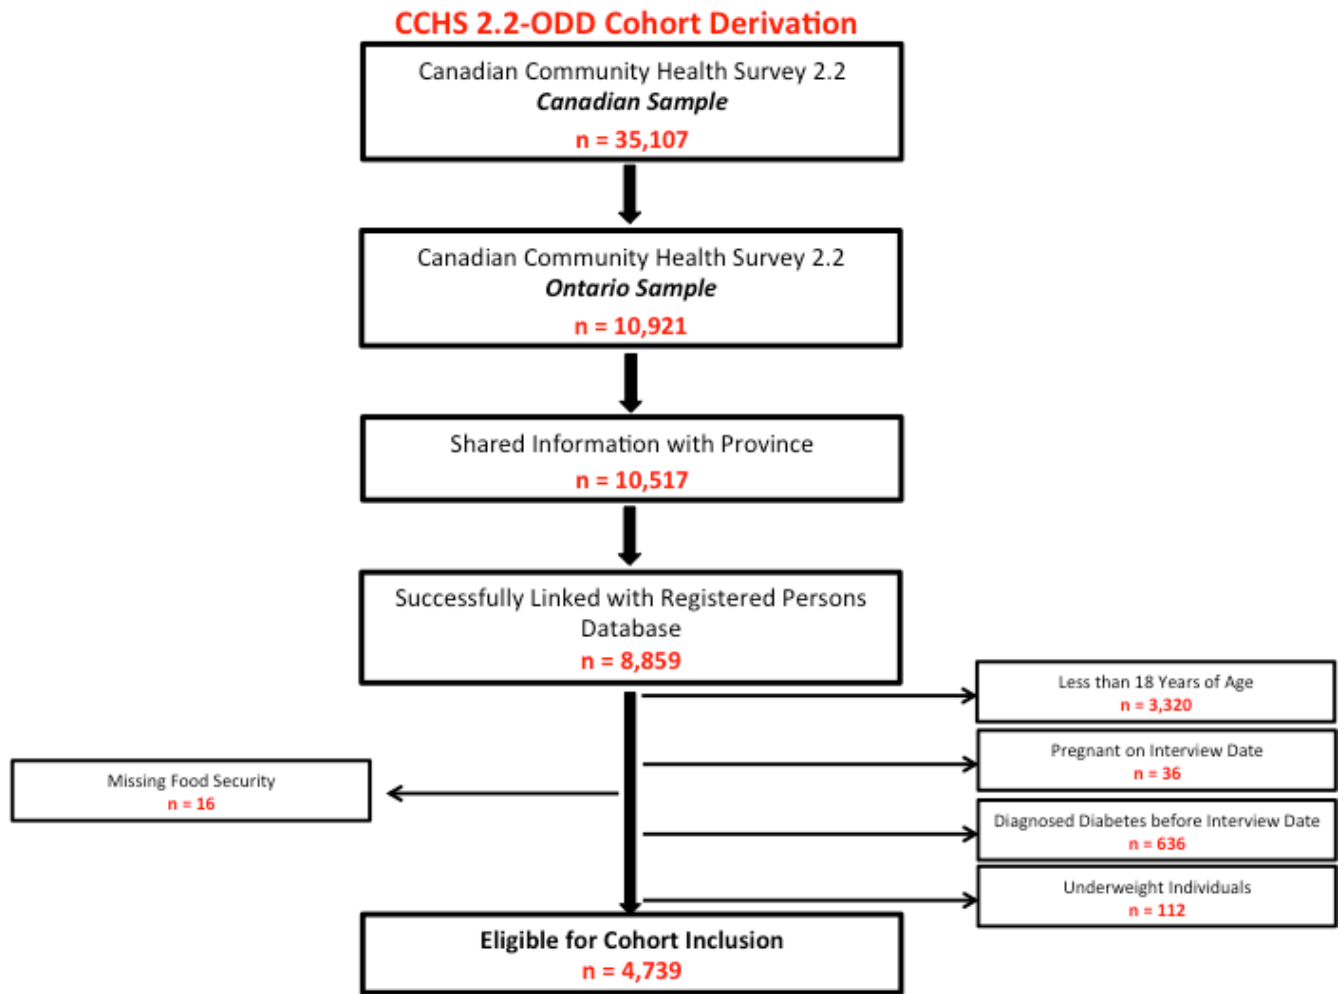

Supplement: pone.0195962.s001.pdf [file pone.0195962.s001.pdf]
